# Supplementary material
Source: PubMed Central journal article supplement (PMC3742141)
Supplement: supp_140.17.3532_DEV096891.pdf [file supp_140.17.3532_DEV096891.pdf]

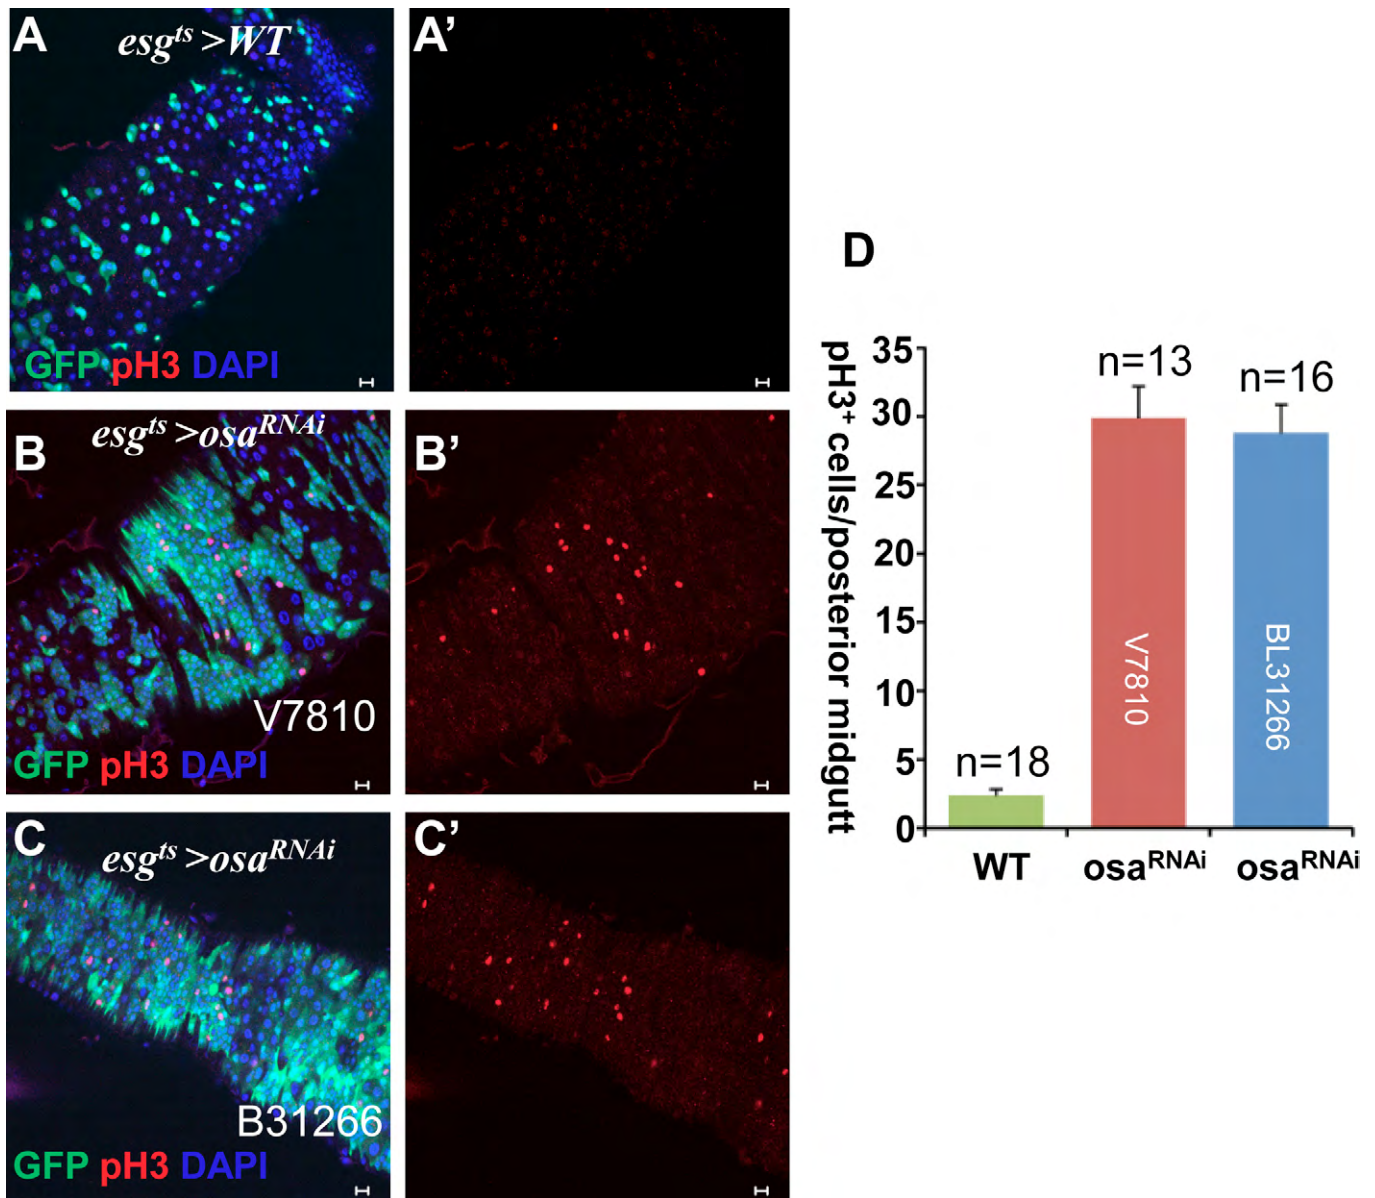

**Fig. S1. Knockdown of *osa* increases cell division in posterior midgut.** (A-C') The wild-type control and *osa<sup>RNAi</sup>* were expressed in the adult midgut using *esg<sup>ts</sup>*. As compared with the wild-type control (A,A'), there were more pH3-positive dividing cells in *osa<sup>RNAi</sup>* posterior midguts (V7810 in B,B' and BL31266 in C,C'). (D) Quantification of pH3-positive cells in wild-type and *osa<sup>RNAi</sup>* posterior midguts. Data are mean  $\pm$  s.e.m.

*esg-lacZ*

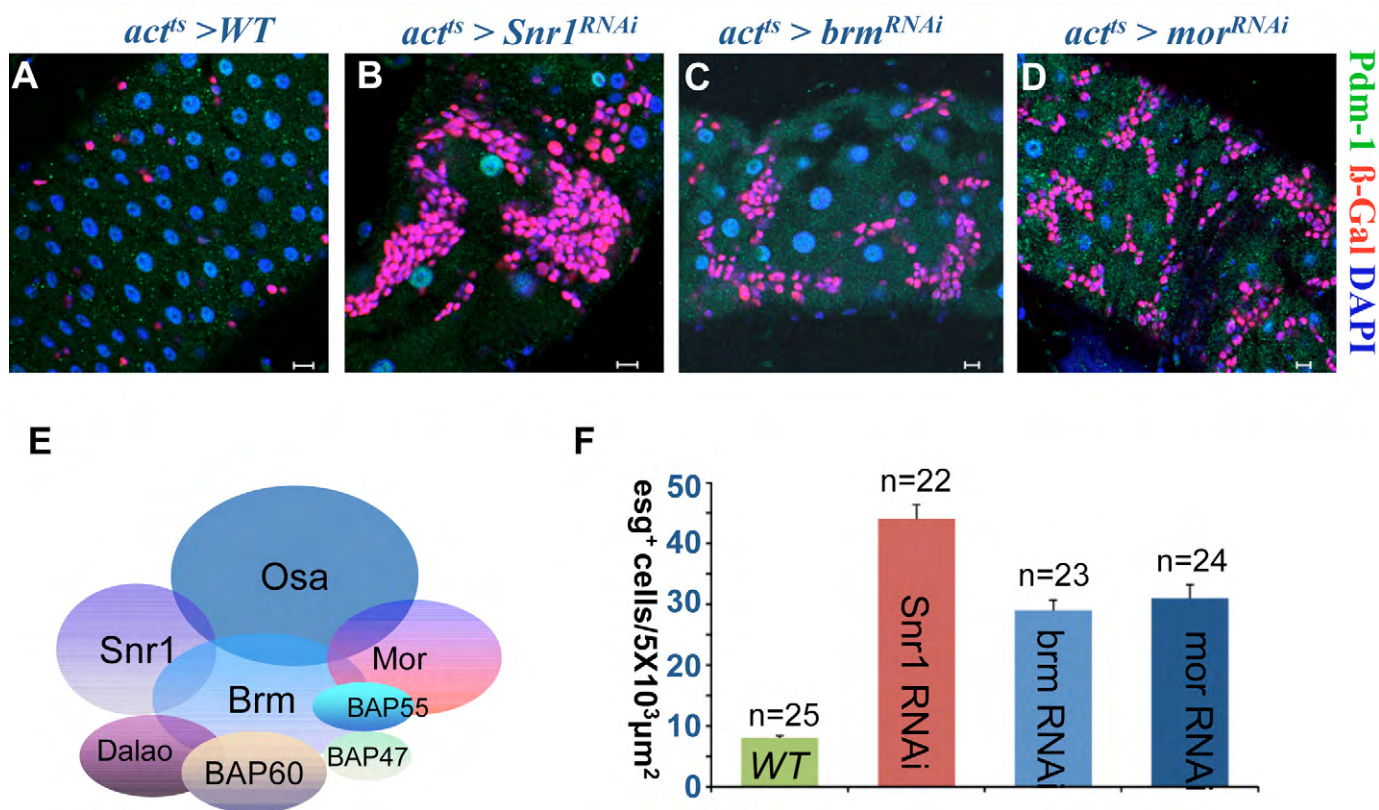

**Fig. S2. Knockdown of other components in the SWI/SNF complex results in the expansion of *esg*-expressing cells.** (A-D) The indicated genes were depleted in the adult *Drosophila* intestine using the *act<sup>ts</sup>* (*act-Gal4, esg-lacZ/+; tub-Gal80<sup>ts</sup>/+*) driver. (A) Wild-type control (*WT*). (B) *UAS-Snr1<sup>RNAi</sup>* V12645. (C) *UAS-brm<sup>RNAi</sup>* V37721. (D) *UAS-mor<sup>RNAi</sup>* V6969. Scale bars: 10  $\mu\text{m}$ . (E) Illustration of the *Osa*-containing SWI/SNF (*Brm*) complex. (F) Quantification of *esg<sup>+</sup>* cells in wild-type, *Snr1<sup>RNAi</sup>*, *brm<sup>RNAi</sup>* and *mor<sup>RNAi</sup>* midguts. *esg-lacZ*-positive cells in  $5 \times 10^3 \mu\text{m}^2$  gut tissue number eight for wild type ( $n=25$ ); 44 for *Snr1* ( $n=22$ ); 29 for *brm* ( $n=23$ ); and 31 for *mor* ( $n=24$ ). Data are mean  $\pm$  s.e.m.

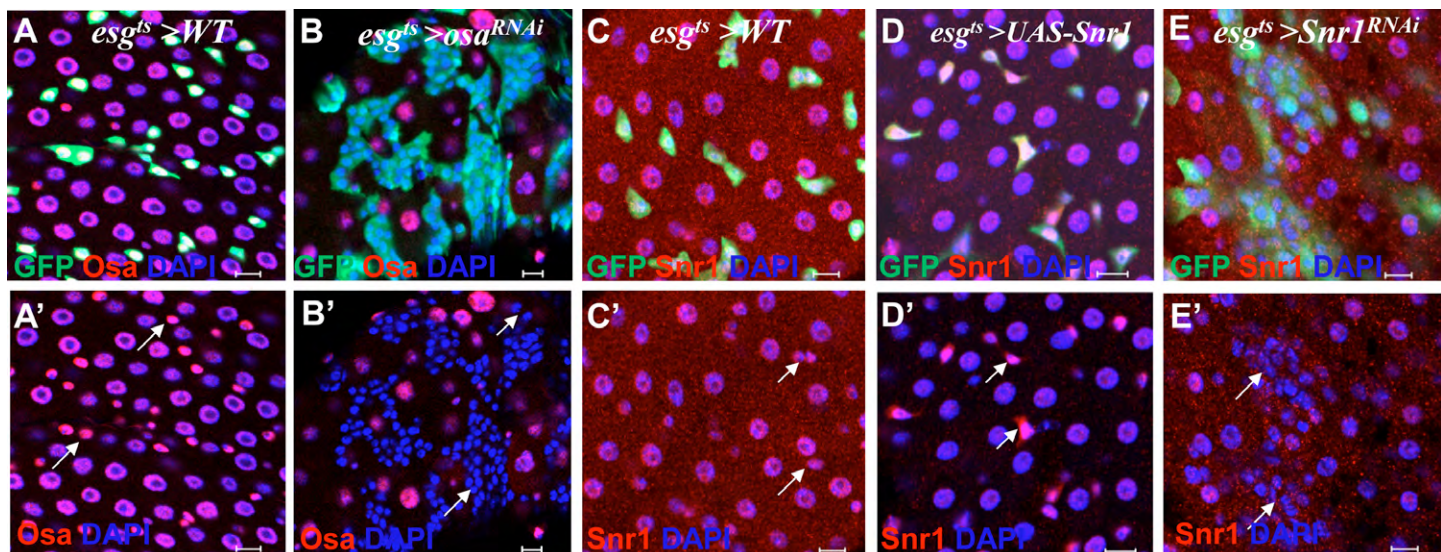

**Fig. S3. *Osa* and *Snr1* are expressed in all cell types in the posterior midgut.** (A-B') The wild-type control and *osa<sup>RNAi</sup>* were expressed in the adult midgut using *esg<sup>ts</sup>*. *Osa* is expressed in all cell types, including ISCs and EBs (arrows), in the wild-type midgut (A,A'). *Osa* is undetectable in GFP-labeled *osa<sup>RNAi</sup>* cells (B,B', arrows). (C-E') The wild-type control, *UAS-Snr1* and *Snr1<sup>RNAi</sup>* were expressed in the adult midgut. *Snr1* is expressed in all cell types, including ISCs and EBs (arrows), in the wild-type midgut (C,C'). The higher expression of *Snr1* was detected in GFP-labeled ISCs and EBs in the *UAS-Snr1*-overexpressing midgut (D,D', arrows), but the expression of *Snr1* in GFP-labeled *Snr1<sup>RNAi</sup>* cells (E,E', arrows) was undetectable. Scale bars: 10  $\mu\text{m}$ .

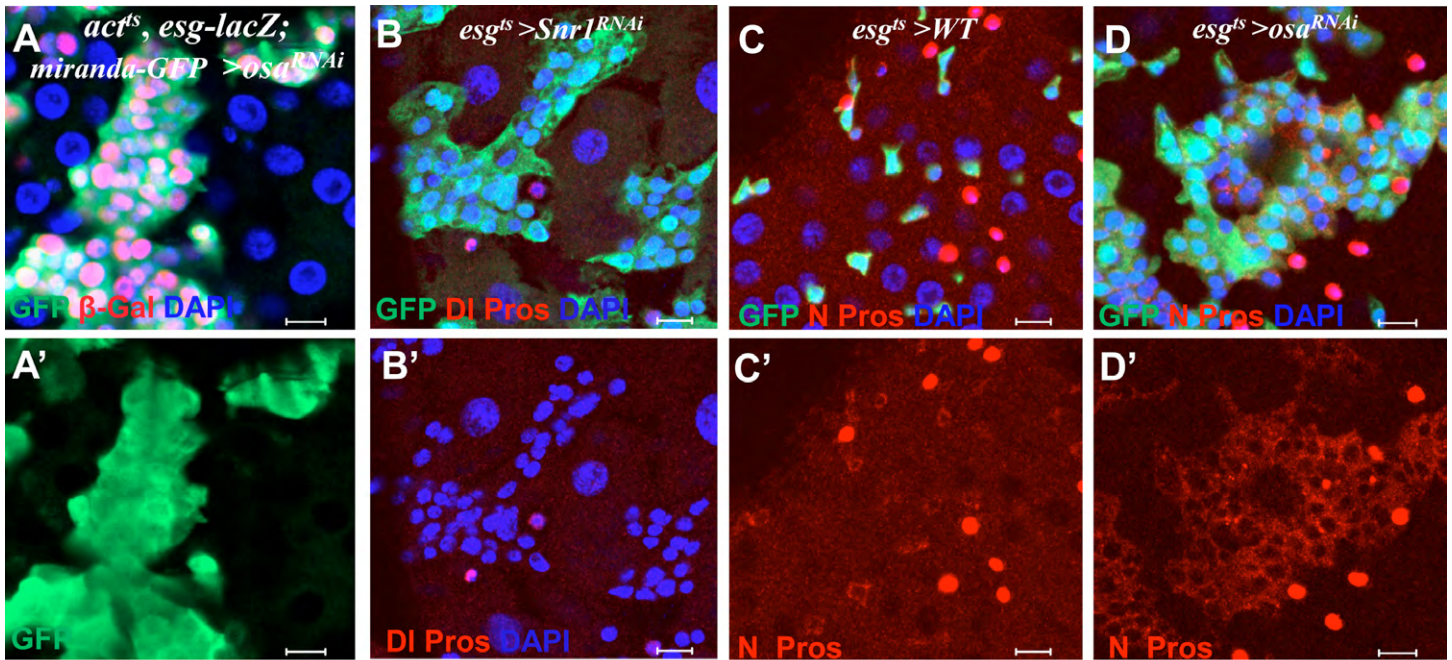

**Fig. S4. The expression of Notch is unchanged in *osa*<sup>RNAi</sup> cells.** The wild-type control and *osa*<sup>RNAi</sup> or *Snr1*<sup>RNAi</sup> are expressed in the adult midgut using *esg*<sup>ts</sup>. (A,A') The ISC marker Mira-GFP is expressed in all expanded *esg*<sup>+</sup> cells in the *osa*<sup>RNAi</sup> midgut, suggesting that these cells are ISC-like cells. (B,B') No DI expression was detected in the expanded ISC-like cells in the *Snr1*<sup>RNAi</sup> midgut. (C-D') In comparison to the wild-type control (C,C'), the expression of N is unchanged in the *osa*<sup>RNAi</sup> midgut (D,D'). Scale bars: 10  $\mu$ m.

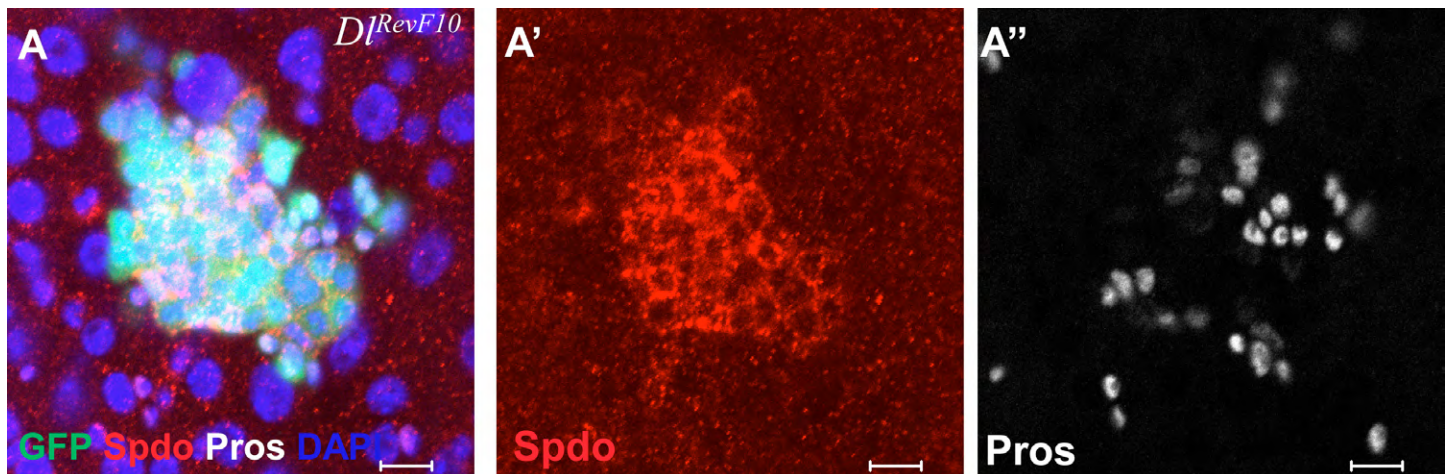

**Fig. S5. *Df* mutant MARCM clone.** (A-A'') GFP<sup>+</sup> *FRT*<sup>82B</sup>-*Df*<sup>RevF10</sup> clones were generated in the posterior midguts of flies of the indicated genotypes using the MARCM technique, and the clones were stained at 8 days ACI with the indicated antibodies. In the *Df* mutant clone, there were many Pros<sup>+</sup> EEs in addition to Spdo<sup>+</sup> ISC-like cells. Scale bars: 10  $\mu$ m.

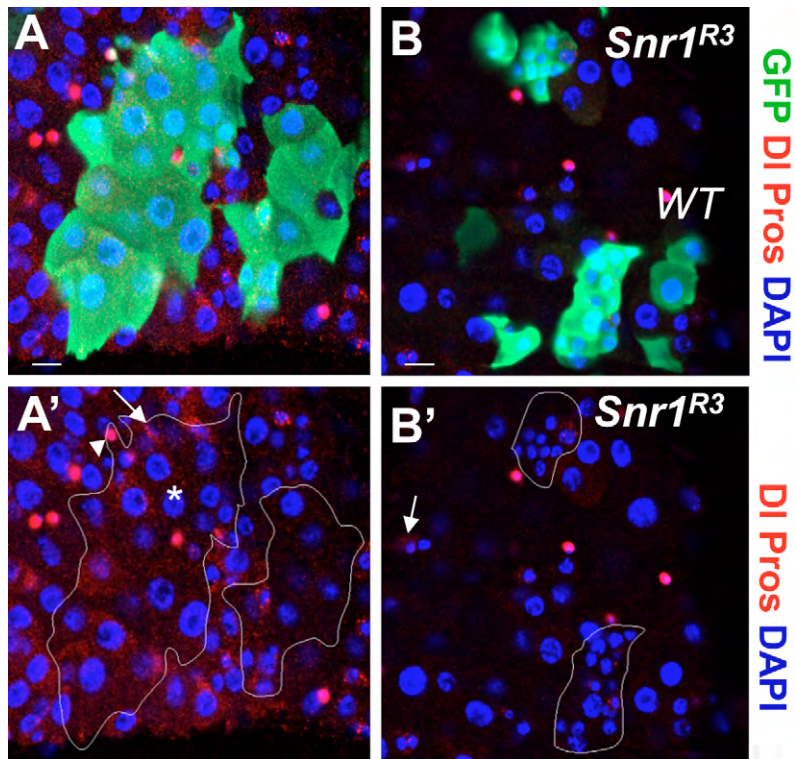

**Fig. S6. *Snr1* autonomously regulates ISC fate.** GFP<sup>+</sup> clones were generated in the posterior midguts of flies of the indicated genotypes using the MARCM technique and stained at 6 days ACI with the indicated antibodies. (A,A') *FRT<sup>82B</sup>* wild-type control clones. In wild-type clones there are DI-labeled ISCs (arrow), EBs, differentiated ECs (large nuclei, asterisk) and Pros-positive EE cells (arrowhead). (B,B') MARCM clones of *Snr1<sup>R3</sup>* lead to ISC-like cell expansion.

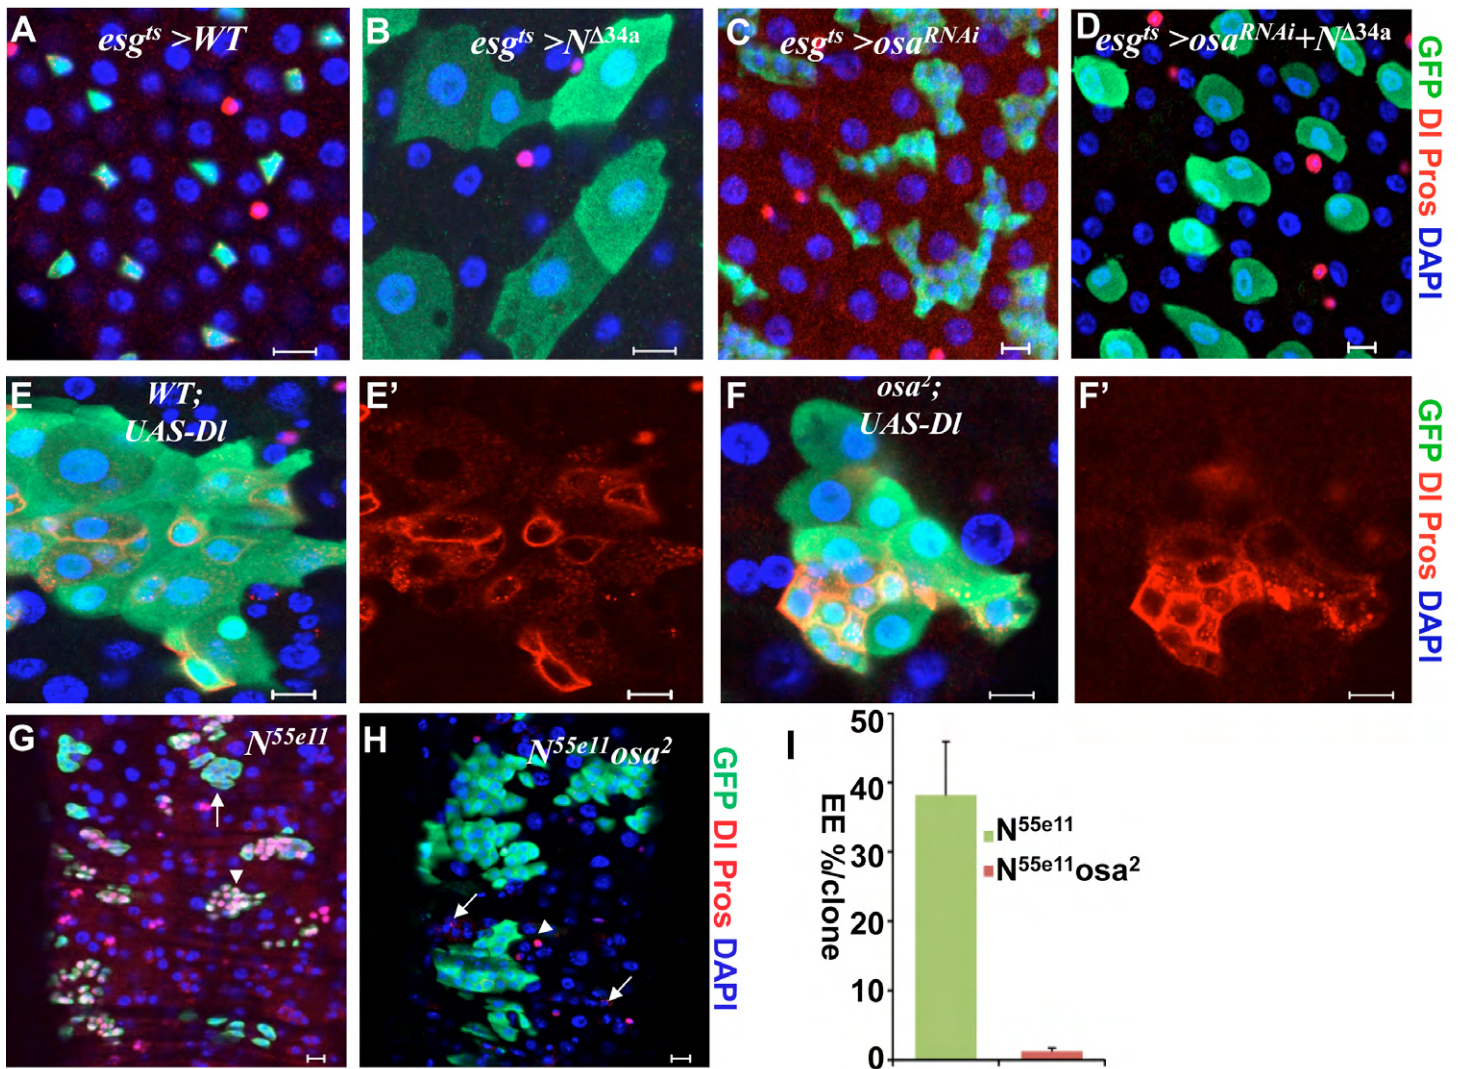

**Fig. S7. Osa functions upstream of N in regulating ISC differentiation into ECs but downstream of N in regulating EE cell formation.** (A-D) *Osa* functions upstream of N in regulating ISC fate specification. (A) Wild-type control. (B) Overactivation of N by expressing *UAS-N<sup>Δ34a</sup>* leads to ISC differentiation into ECs. (C) The expression of *osa<sup>RNAi</sup>* results in ISC-like cell expansion. (D) The expression of *osa<sup>RNAi</sup>* plus *UAS-N<sup>Δ34a</sup>* results in ISC differentiation into ECs. (E-F') The expression of *UAS-Dl* in *osa<sup>2</sup>* mutant MARCM clones rescues the ISC-like stem cell tumor phenotype (F,F'). The wild-type MARCM clones expressing *UAS-Dl* were used as a control (E,E'). (G-I) *Osa* functions downstream of N in regulating EE cell formation. GFP<sup>+</sup> clones were generated in the posterior midguts of flies of the indicated genotypes using the MARCM technique, and the clones were stained at 6 days ACI with the indicated antibodies. The *osa<sup>2</sup>* mutation suppresses the phenotype of excess EE cells associated with the *N<sup>55e11</sup>* mutation. Arrows, Dl-positive ISCs; arrowheads, Pros-positive EE cells. (I) Analysis of the percentage of Pros<sup>+</sup> EE cells in *N* or *N; osa* double-mutant clones at 6 days ACI. *osa<sup>2</sup>* suppresses the excess Pros<sup>+</sup> EE cells in the *N<sup>55e11</sup>* mutant clones. Data are mean ± s.e.m. Scale bars: 10 μm.

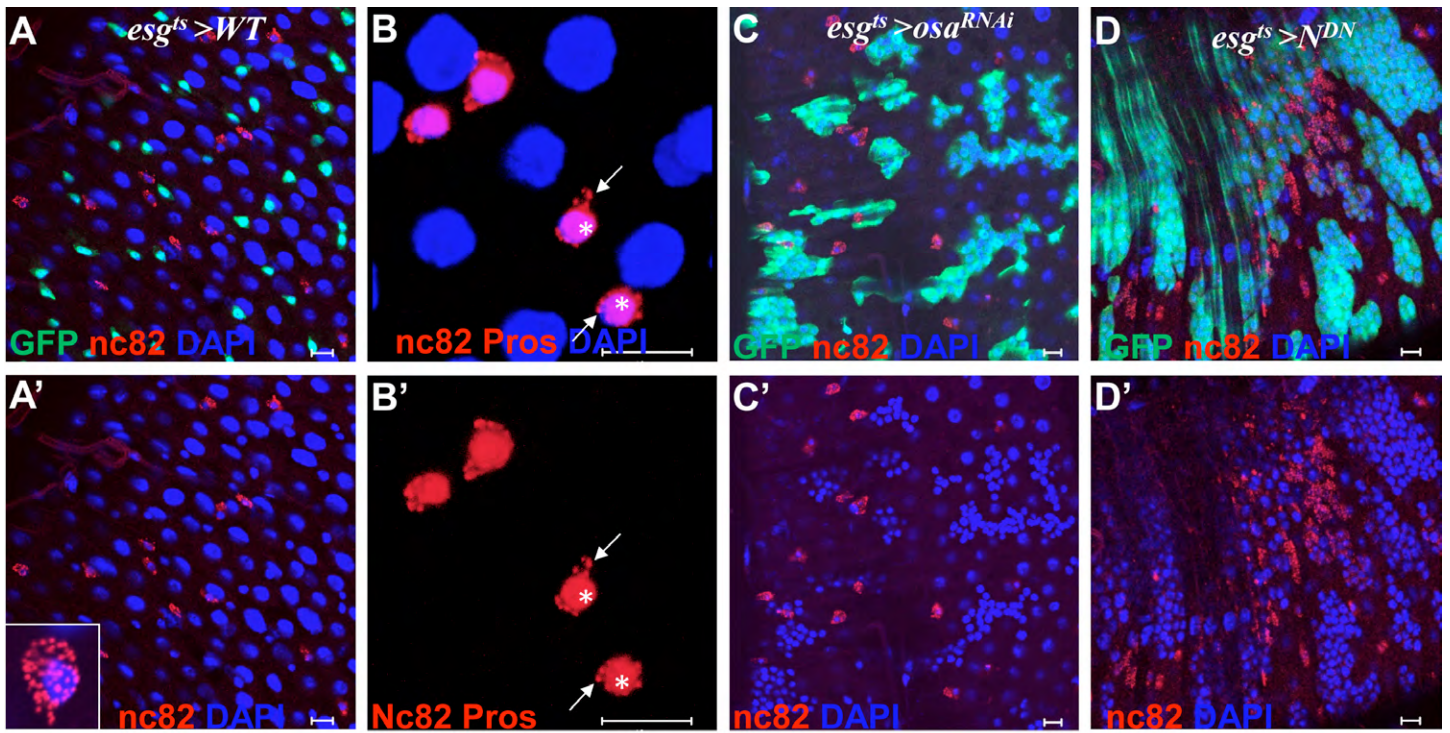

**Fig. S8. nc82, a synaptic marker, specifically labels EE cells in the midgut.** (A,A') nc82 specifically labels *esg<sup>-</sup>* diploid cells in wild-type flies. Membrane-associated punctate staining by nc82 (inset in A'). (B,B') nc82 (arrow, punctate staining) labels Pros-positive (asterisk, nuclear staining) EE cells. (C,C') No nc82-positive EE cells were found in *esg<sup>+</sup>* cell clusters in the *osa<sup>RNAi</sup>* midgut. (D,D') nc82-positive EE cell clusters in the *N<sup>DN</sup>* midgut. All flies were driven by *esg<sup>ts</sup>* and stained with the indicated antibodies. Scale bars: 10 μm.

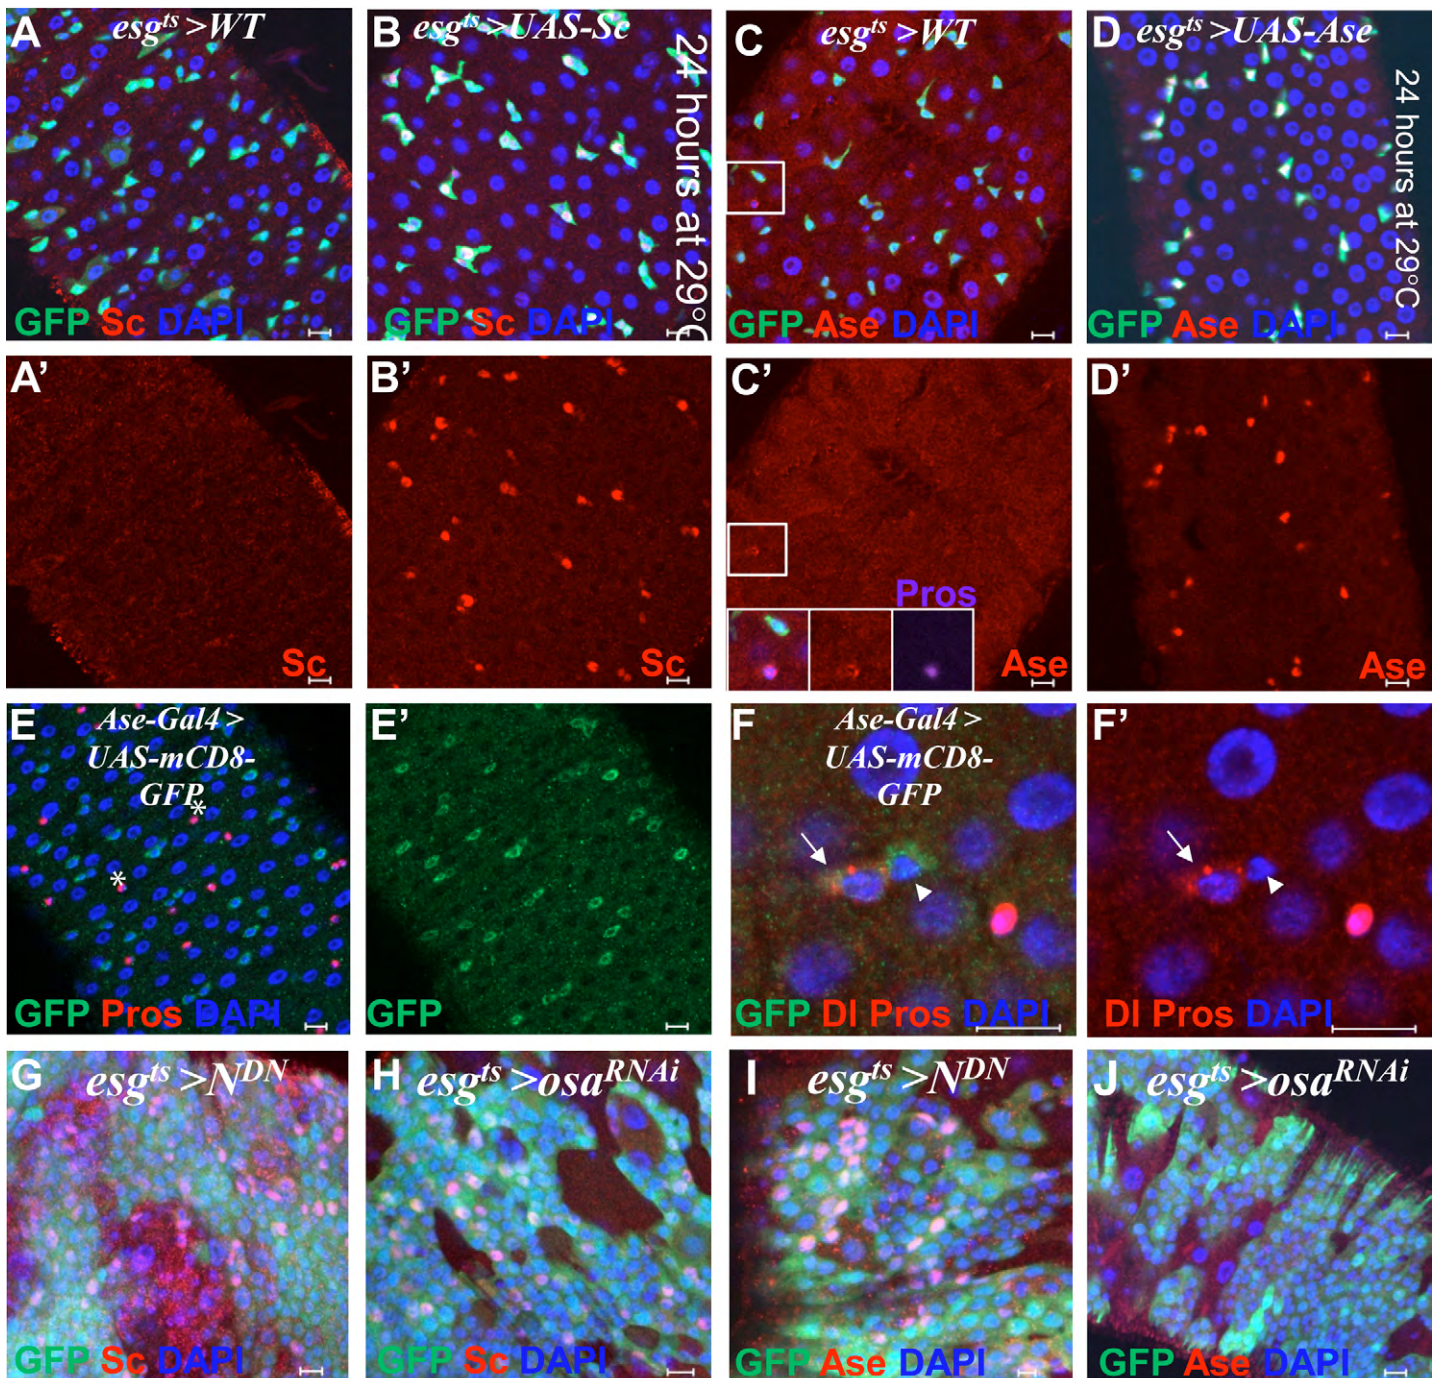

**Fig. S9. Ase and Sc are expressed in the midgut at low levels.** (A-B') Endogenous Sc is not detected above background levels by immunofluorescence (A,A'). Nevertheless, Sc is readily detected in the gut with ectopic *UAS-sc* expression driven by *esg<sup>ts</sup>* for 24 hours at 29°C (B,B'). (C-D') Endogenous Ase is also not detected above background levels by immunofluorescence (C,C'). Nevertheless, Ase is readily detected in the gut with ectopic *UAS-ase* expression driven by *esg<sup>ts</sup>* for 24 hours at 29°C (D,D'). There is non-specific staining in some portion of the EE cells by the anti-Ase serum, labeling the membrane and cytoplasm, which is not consistent with the nuclear localization of Ase (inset in C,C'). (E-F') Ase-Gal4 is weakly expressed in ISCs and EBs (E,E') but not in Pros<sup>+</sup> EEs (asterisk). GFP is detected in doublet cells, one of which is a DI-positive ISC (arrow in F,F') and the other an EB (arrowhead in F,F'). (G,H) The expression of *sc* is upregulated in both *N<sup>DN</sup>* (G) and *osa<sup>RNAi</sup>* (H) midguts (compare with A,A'). (I,J) The expression of *ase* is upregulated in the *N<sup>DN</sup>* midgut (I) but not in the *osa<sup>RNAi</sup>* midgut (J) (compare with C,C'). The wild-type and *osa<sup>RNAi</sup>* were driven by *esg<sup>ts</sup>* and stained by the indicated antibodies. Scale bars: 10  $\mu$ m.

**Table S1. Primers**

| Gene        | Forward (5'-3')       | Reverse (5'-3')        |
|-------------|-----------------------|------------------------|
| <b>qPCR</b> |                       |                        |
| <i>Rp49</i> | TACAGGCCCAAGATCGTGAA  | CACGTTGTGCACCAGGAACTTC |
| <i>Dl</i>   | CACTCGACTTGCTCGGAGAC  | CAGGGTCTGTGGTTGGTGCAG  |
| <i>ase</i>  | GTCAACGGAAGAGGCCCTG   | CTACGGGCAACGGCTTGTG    |
| <i>sc</i>   | GCTTCAGGATCTGGTGGATG  | ATCCTGCATCTCCACCTGGTAC |
| <b>ChIP</b> |                       |                        |
| <i>Dl</i>   | CGAACTGCGGAGTCTTCTCCT | TCGGTGTGTGACGCGAACTGC  |
| <i>spdo</i> | GATCGCGTTGAGACGTCTCAG | ACTGCGACTCGACTGATCTAG  |
| <i>ase</i>  | GAGAGAGAGCGTGGCGAAATC | CAGAAGGCATTTGAGGTCTGCG |
